# Supplementary material for: A well fabricated PtSn/SiO2 catalyst with enhanced synergy between Pt and Sn for acetic acid hydrogenation to ethanol
Source: Royal Society of Chemistry journal article supplement (doi:10.1039/c6ra09199g), 2016-01-01
Supplement: c6ra09199g1.pdf [file c6ra09199g1.pdf]

## Supporting Information

### **A well fabricated PtSn/SiO<sub>2</sub> catalyst with enhanced synergy between Pt and Sn for acetic acid hydrogenation into ethanol**

Guozhen Xu, Jian Zhang\*, Shengping Wang, Yujun Zhao\*, and Xinbin Ma

Key Laboratory for Green Chemical Technology of Ministry of Education, Collaborative Innovation Centre of Chemical Science and Engineering, School of Chemical Engineering and Technology, Tianjin University, Tianjin 300072, China

\* Corresponding author:

Dr. Jian Zhang, Tel. & fax: 022-87401818, E-mail: zhangjian1985@tju.edu.cn

Prof. Yujun Zhao, Tel. & fax: 022-87401818, E-mail: yujunzhao@tju.edu.cn

## **Table of Contents**

- 1. BET results of the reduced catalysts**
- 2. EDX elemental-mapping analysis of the PtSn<sub>1.6</sub>/SiO<sub>2</sub>-MTSG catalyst**
- 3. TPR measurements**
- 4. TEM images of the reduced PtSn<sub>x</sub>/SiO<sub>2</sub>-MTSG catalysts**
- 5. Integral results of Lewis acid sites**
- 6. The influence of kinetics parameters on the catalytic performance**

## 1. BET results of the reduced catalysts

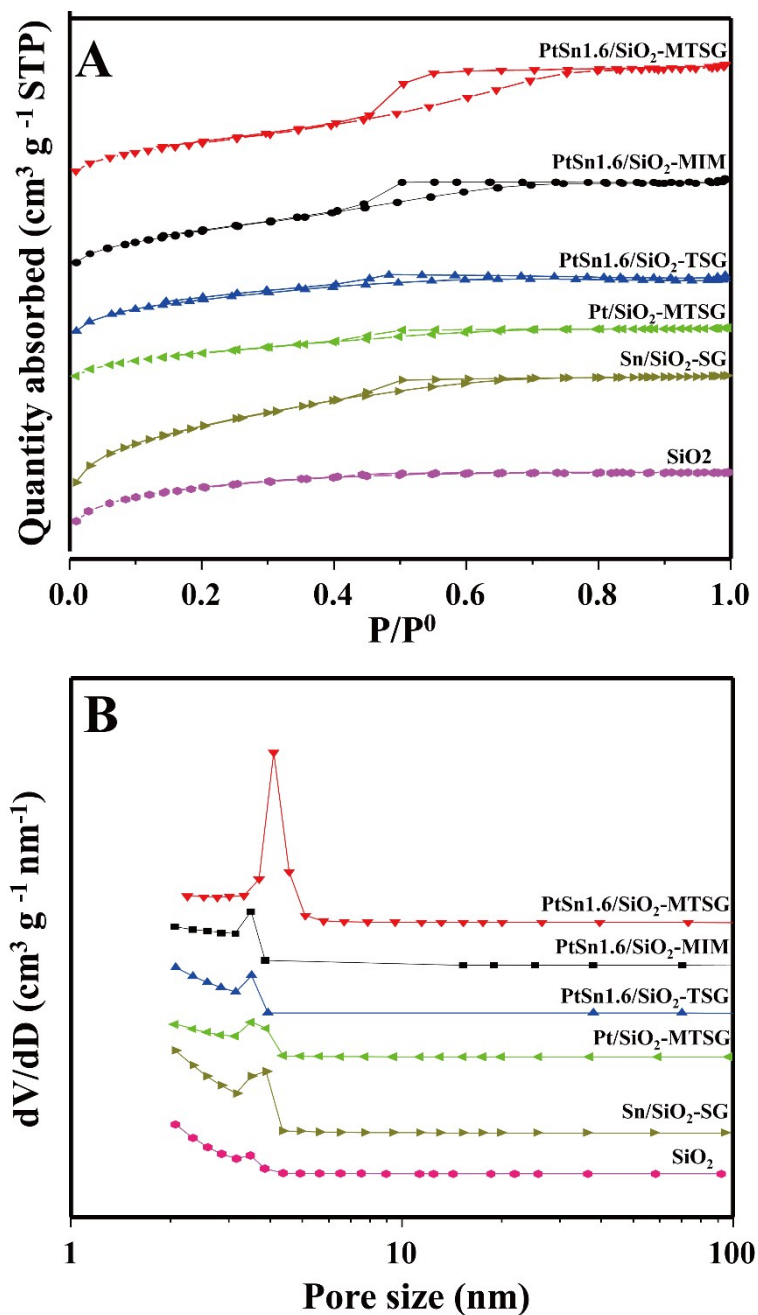

**Fig. S1.** A) N<sub>2</sub> adsorption-desorption isotherms, B) pore size distribution of reduced catalysts.

The N<sub>2</sub> adsorption-desorption isotherms of the reduced catalysts are exhibited in Fig. S1A. All the samples display type IV hysteresis loop isotherms, indicating that the mesoporous structures are largely maintained after the incorporation of Pt and Sn precursors. Pore size distribution obtained from the desorption branches of the N<sub>2</sub>

isotherms using the BJH method reveals that  $\text{SiO}_2$  and  $\text{Sn/SiO}_2\text{-SG}$  support have narrow pore size distribution as illustrated in Fig. S1B. The BET surface area for the  $\text{Sn/SiO}_2\text{-SG}$  support is  $975 \text{ m}^2\cdot\text{g}^{-1}$ , which is much higher than the  $\text{PtSn/SiO}_2$  catalysts ( $400\text{-}600\text{m}^2\cdot\text{g}^{-1}$ ) (listed in Table 1). The decrease in the specific surface area may be caused by the blocking of partial pore structure when Pt is uploaded. Additionally, the  $\text{Sn/SiO}_2\text{-SG}$  support exhibit an appropriate pore size and pore distribution, which facilitate the dispersion of metal particles. As to the  $\text{PtSn/SiO}_2$  catalysts, the  $\text{PtSn1.6/SiO}_2\text{-MTSG}$  catalyst displays a slight superiority in the specific pore size and distribution.

## 2. EDX elemental-mapping analysis of the PtSn1.6/SiO<sub>2</sub>-MTSG catalyst

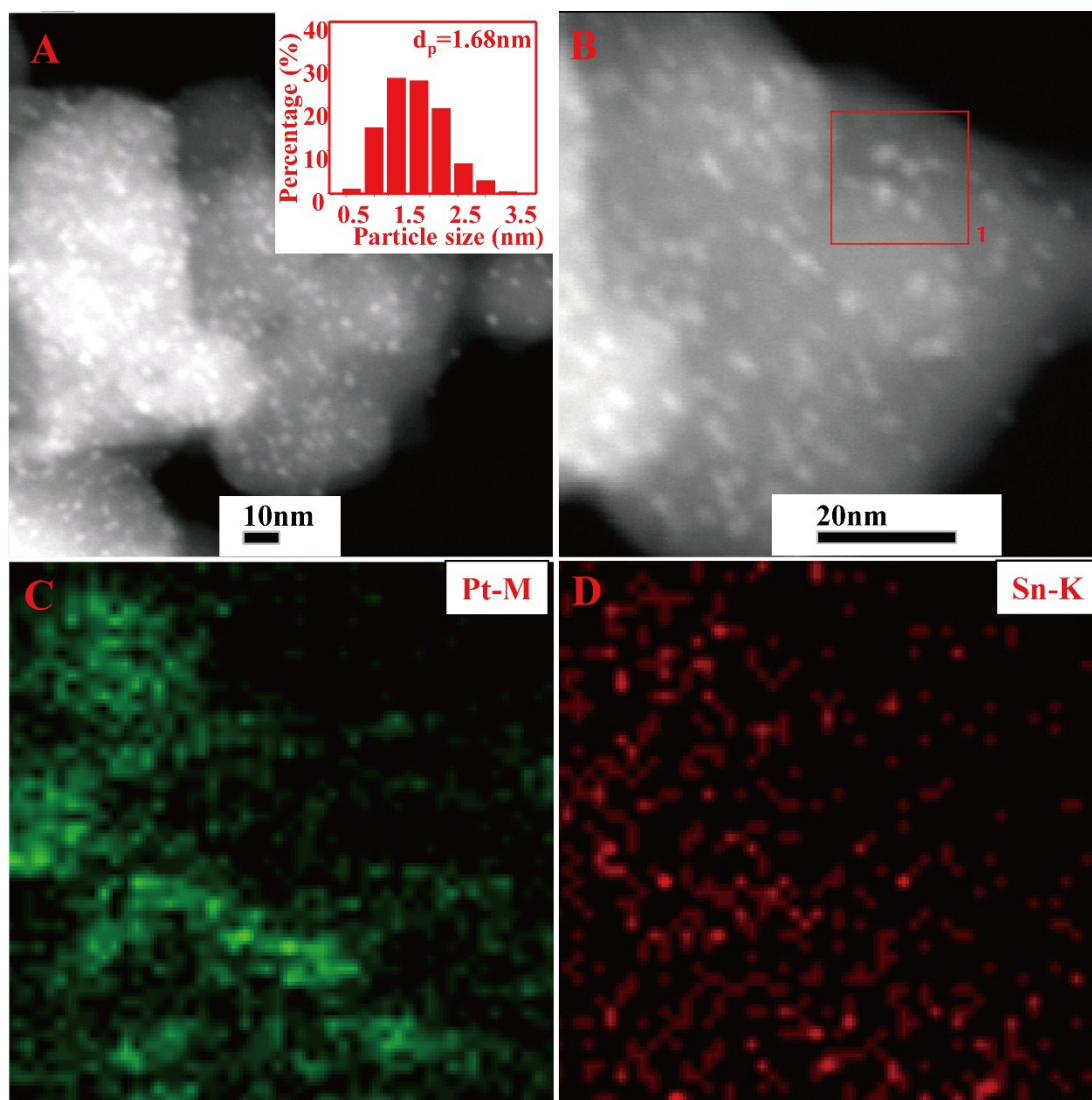

**Fig. S2.** A, B) HAADF-STEM images. C, D) EDX elemental-mapping images of the reduced PtSn<sub>1.6</sub>/SiO<sub>2</sub>-MTSG catalyst.

### 3. TPR measurements

**Table S1.** Fitted results of H<sub>2</sub>-TPR experiments of catalysts

| Catalyst                       | T <sub>M</sub> |     |     | Total consumption (mmol/g) | Consumption (mmol/g) |       |       |
|--------------------------------|----------------|-----|-----|----------------------------|----------------------|-------|-------|
|                                | I              | II  | III |                            | I                    | II    | III   |
| Sn/SiO <sub>2</sub> -SG        | --             | --  | 503 | 0.062                      | --                   | --    | 0.062 |
| Pt/SiO <sub>2</sub> -MTSG      | 206            | 366 | --  | 0.062                      | 0.022                | 0.040 | --    |
| PtSn1.6/SiO <sub>2</sub> -MTSG | --             | 282 | 430 | 0.071                      | --                   | 0.054 | 0.017 |
| PtSn1.6/SiO <sub>2</sub> -MIM  | --             | 272 | 360 | 0.076                      | --                   | 0.050 | 0.026 |
| PtSn1.6/SiO <sub>2</sub> -TSG  | 91             | 193 | 420 | 0.066                      | 0.015                | 0.039 | 0.012 |

#### 4. TEM images of the reduced $\text{PtSn}_x/\text{SiO}_2$ -MTSG catalysts

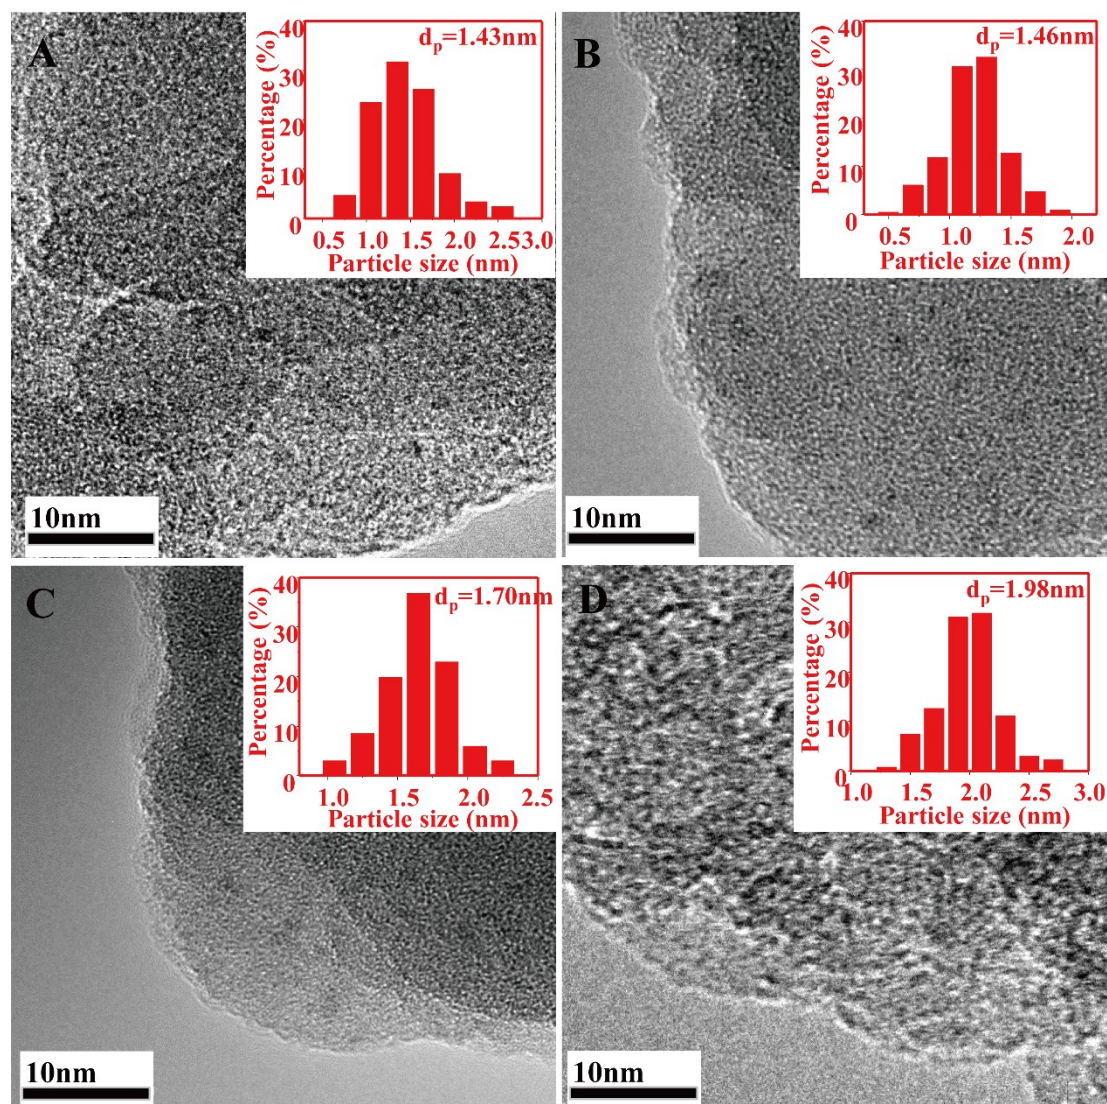

**Fig. S3.** TEM images of the reduced  $\text{PtSn}_x/\text{SiO}_2$ -MTSG catalysts. A)  $\text{PtSn}_{1.0}/\text{SiO}_2$ -MTSG, B)  $\text{PtSn}_{1.6}/\text{SiO}_2$ -MTSG, C)  $\text{PtSn}_{3.3}/\text{SiO}_2$ -MTSG, D)  $\text{PtSn}_{8.2}/\text{SiO}_2$ -MTSG.

## 5. Integral results of Lewis acid sites

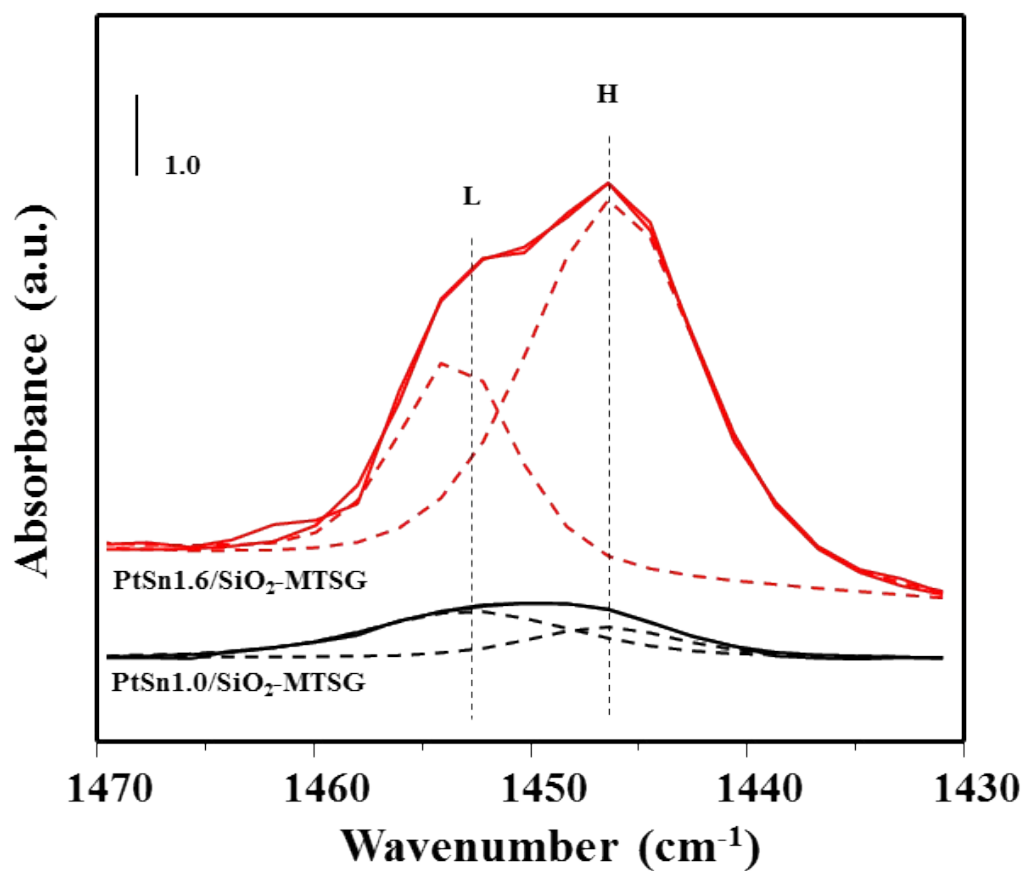

**Fig. S4.** Deconvolution of the fit about FTIR spectra of chemisorbed pyridine on reduced catalysts.

**Table S2.** Integral quantity of Lewis acid sites of reduced catalysts <sup>a</sup>.

| Catalyst                                              | PtSn1.0/SiO <sub>2</sub> -MTSG | PtSn1.6/SiO <sub>2</sub> -MTSG | PtSn3.3/SiO <sub>2</sub> -MTSG | PtSn8.2/SiO <sub>2</sub> -MTSG |
|-------------------------------------------------------|--------------------------------|--------------------------------|--------------------------------|--------------------------------|
| Lewis acid sites (μmol·g <sup>-1</sup> ) <sup>b</sup> | 5.1                            | 13.4                           | 14.4                           | 56.4                           |

<sup>a</sup> Catalysts determined when pyridine was adsorbed at 50 °C and outgassed at 150 °C.

<sup>b</sup> Amount of adsorbed pyridine (integration regions approximately at 1430-1470cm<sup>-1</sup>).



## 6. The influence of kinetics parameters on the catalytic performance

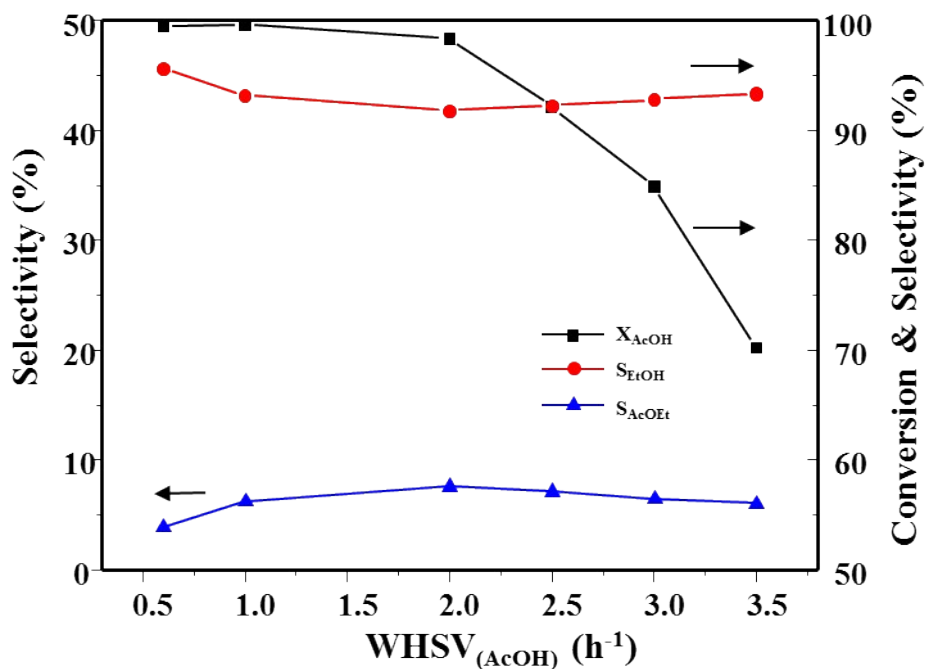

**Fig. S5.** Hydrogenation performance of AcOH over PtSn1.6/SiO<sub>2</sub>-MTSG catalyst as a function of WHSV<sub>(AcOH)</sub>. Reaction conditions: 270 °C, 2.6 MPa, H<sub>2</sub>/AcOH (mol/mol) = 20.

**Table S3.** Hydrogenation performance of AcOH over PtSn1.6/SiO<sub>2</sub>-MTSG catalysts

| WHSV (h <sup>-1</sup> ) | Conv. (%) | Selectivity (%) |       |
|-------------------------|-----------|-----------------|-------|
|                         |           | EtOH            | AcOEt |
| 1 <sup>a</sup>          | 99.7      | 91.0            | 8.1   |
| 2 <sup>a</sup>          | 98.9      | 86.6            | 12.4  |
| 3 <sup>a</sup>          | 86.9      | 87.2            | 12.0  |
| 1 <sup>b</sup>          | 97.8      | 91.7            | 8.0   |
| 2 <sup>b</sup>          | 71.0      | 93.1            | 6.5   |
| 3 <sup>b</sup>          | 51.8      | 93.9            | 5.7   |
| 1 <sup>c</sup>          | 96.4      | 91.2            | 7.8   |
| 2 <sup>c</sup>          | 67.3      | 92.5            | 6.4   |
| 3 <sup>c</sup>          | 49.5      | 93.0            | 5.9   |

<sup>a</sup> Reaction conditions: 270 °C, 2.6 MPa, H<sub>2</sub>/AcOH (mol/mol) = 10.

<sup>b</sup> Reaction conditions: 250 °C, 2.6 MPa, H<sub>2</sub>/AcOH (mol/mol) = 20.

<sup>c</sup> Reaction conditions: 270 °C, 1.5 MPa, H<sub>2</sub>/AcOH (mol/mol) = 20.

As listed in Table S3, the influence of space velocity of AcOH ( $\text{WHSV}_{(\text{AcOH})}$ ) on the catalytic performance were evaluated at different reaction conditions. Conversion of AcOH decreases with the increase of  $\text{WHSV}_{(\text{AcOH})}$  at all different reaction conditions. Ethanol selectivity firstly decreases with the increase of  $\text{WHSV}_{(\text{AcOH})}$  and then remains unchanged when  $\text{WHSV}_{(\text{AcOH})}$  is further increased at the conditions: 270°C, 2.6 MPa,  $\text{H}_2/\text{AcOH}$  (molar ratio) = 10. When the reaction was conducted at 250 °C, selectivity of ethanol remains the same with the increase of  $\text{WHSV}_{(\text{AcOH})}$ . Similarly, ethanol selectivity hardly changes with the increase of  $\text{WHSV}_{(\text{AcOH})}$  at the pressure of 1.5 MPa.
